# Supplementary material for: Development and Characterization of a Cancer Cachexia Rat Model Transplanted with Cells of the Rat Lung Adenocarcinoma Cell Line Sato Lung Cancer (SLC)
Source: MDPI journal article supplement (doi:10.3390/biomedicines11102824), 2023-10-18
Supplement: s1 [file s1]

**Development and Characterization of a Cancer Cachexia  
Rat Model Transplanted with Cells of the Rat Lung  
Adenocarcinoma Cell Line Sato Lung Cancer (SLC)**

**Eiji Kasumi \*, Miku Chiba, Yoshie Kuzumaki, Hiroyuki Kuzuoka, Norifumi Sato  
and Banyu Takahashi**

R&D Laboratories, EN Otsuka Pharmaceutical Co., Ltd., Hanamaki 025-0312, Japan;  
sato.norifumi.a@otsuka.jp (N.S.)

\* Correspondence: kasumi.eiji@otsuka.jp; Tel.: +81-198-30-1883; Fax: +81-198-30-1819

**Table S1.** mRNA-specific primer pairs for RT-PCR.

| <b>Rat mRNA<br/>(NCBI ID)</b> |         | <b>Sequence (5'-3')</b> |
|-------------------------------|---------|-------------------------|
| MuRF1<br>(AY059627.1)         | Forward | GGAGAAGCTGGACTTCATCG    |
|                               | Reverse | CTTGGAAGCTCAAGAGGAAGG   |
| atrogin-1<br>(AY059628.1)     | Forward | GAACATCATGCAGAGGCTGA    |
|                               | Reverse | GTAAGCCGGTCTTCACTGAGC   |
| GAPDH<br>(AB017801.1)         | Forward | CCCCCAATGTATCCGTTGTG    |
|                               | Reverse | TAGCCCAGGATGCCCTTTAGT   |

RT-PCR, reverse transcriptase polymerase chain reaction; MuRF1, muscle-specific ring  
finger protein 1; GAPDH, glyceraldehyde-3-phosphate dehydrogenase.

**Table S2.** Nutritional composition of the liquid diet used in the tube feeding experiment.

| Components                      | Calories (/100 kcal) |
|---------------------------------|----------------------|
| Proteins (g)                    | 3.5                  |
| Fats (g)                        | 3.5                  |
| Carbohydrates (g)               | 13.7                 |
| Minerals                        |                      |
| Sodium (mg)                     | 80.0                 |
| Potassium (mg)                  | 150.0                |
| Calcium (mg)                    | 53.3                 |
| Magnesium (mg)                  | 20.0                 |
| Phosphorus (mg)                 | 53.3                 |
| Chloride (mg)                   | 136.0                |
| Iron (mg)                       | 0.9                  |
| Zinc (mg)                       | 1.5                  |
| Manganese (mg)                  | 0.2                  |
| Copper (mg)                     | 0.1                  |
| Selenium (µg)                   | 1.6                  |
| Chromium (µg)                   | 0.9                  |
| Molybdenum (µg)                 | 1.9                  |
| Vitamins                        |                      |
| Vitamin A (µg RE <sup>1</sup> ) | 75.0                 |
| Vitamin D (µg)                  | 0.5                  |
| Vitamin E (mg)                  | 3.0                  |
| Vitamin K (µg)                  | 7.0                  |
| Vitamin B1 (mg)                 | 0.2                  |
| Vitamin B2 (mg)                 | 0.2                  |
| Vitamin B6 (mg)                 | 0.2                  |
| Vitamin B12 (µg)                | 0.6                  |
| Vitamin C (mg)                  | 15.2                 |
| Nicotinamide (mg)               | 2.0                  |
| Pantothenic acid (mg)           | 0.5                  |
| Folic acid (µg)                 | 20.0                 |
| Biotin (µg)                     | 15.2                 |
| Choline (g)                     | 0.1                  |

<sup>1</sup> RE, retinol equivalents.
